# Supplementary material for: Public Health Evaluation of COVID-19 Vaccine Acceptability and Health Behaviors in South Africa: Past, Current, and Future Implications (2020–2022)
Source: Hindawi journal article supplement (doi:10.1155/2024/6673623), 2024-04-15
Supplement: f1 [file 6673623.f1.docx]

**Supplementary File 1**

Using “SemiPar*”*  to analyse vaccine acceptability and health behaviours by age

## Title: : Semiparametic Regression

<https://cran.r-project.org/web/packages/SemiPar/SemiPar.pdf>

**Reference:** TBA

**Description:**

**Data:** Africa_COVID19.txt

**## Call the Semiparametric regression package**

**######################################################**

**library(SemiPar)**

**## Fit the model**

**######################################################**

**fit** <- spm(Vaccine_yes~f(age)

+ sex

+ ethnicity

+ education

+ employement,family="binomial"))

**## Plot the fit**

**######################################################**

**plot**(fit, xlab= "Age (Years)", ylab= "Adjusted OR (95% CI)",shade=FALSE,shade.col=rep("grey",6),rug=FALSE)

**## Model Estimated parameters**

**######################################################**

**summary**(fit))

**## Identifying the cut points: Zero crossing:**

**########################################**

**################# First derivative ###################################**

par(mfrow=c(1,2))

plot(fit, "Age (Years)"", rug=FALSE, drv=1)

**################# Second derivative ##########################################################**

plot(fit, "Age (Years)"",rug=FALSE, drv=2)

**References:**

Ruppert D, Wand MP, Carroll RJ. Semiparametric Regression. Cambridge University Press; 2003.

## SemiPar: Semiparametic Regression

<https://cran.r-project.org/web/packages/SemiPar/SemiPar.pdf> (Accessibility verified October 10, 2022)
