# Supplementary material for: Public Health Evaluation of COVID-19 Vaccine Acceptability and Health Behaviors in South Africa: Past, Current, and Future Implications (2020–2022)
Source: Hindawi journal article supplement (doi:10.1155/2024/6673623), 2024-04-15
Supplement: f2 [file 6673623.f2.docx]

**Supplementary File 2: Figure S1:** Intention to receive vaccine: results from “zero crossing”:

1. Pre-vaccine roll out (May-December 2020)

“First derivative” “Second derivative”

**
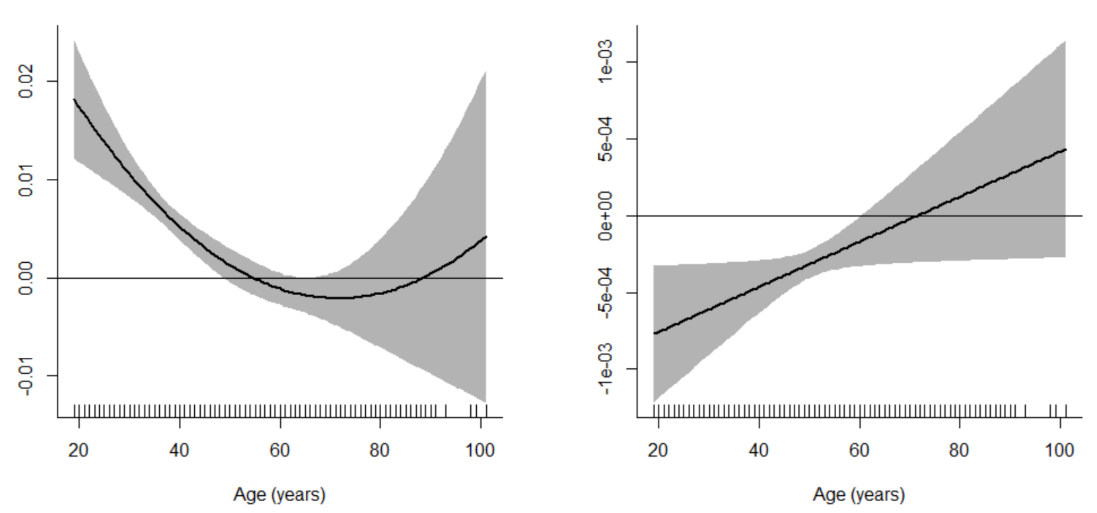
**

1. During-vaccine roll out (February-November 2021)

“First derivative” “Second derivative”

**
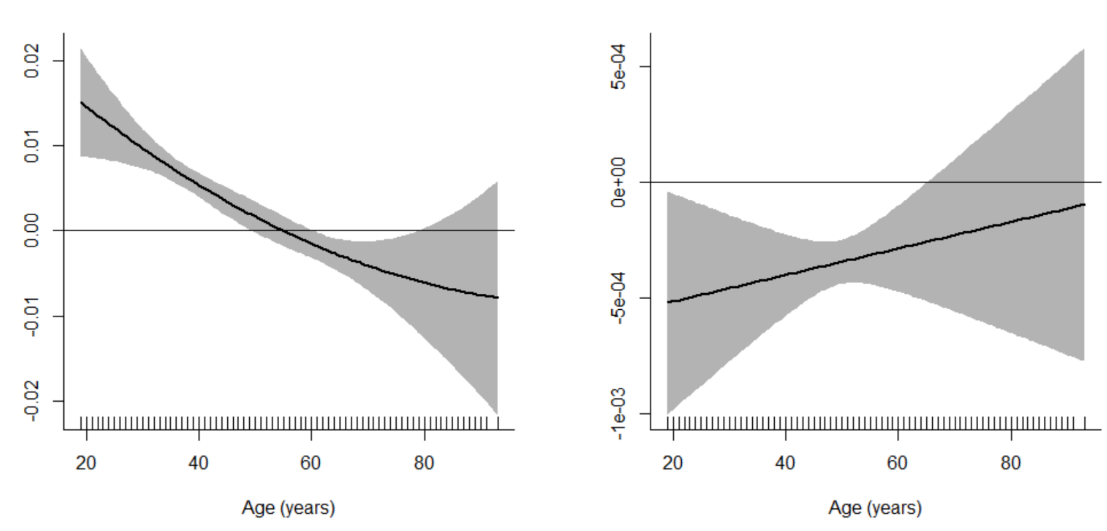
**

1. Post-vaccine roll out (February-March 2022)

“First derivative” “Second derivative”

**
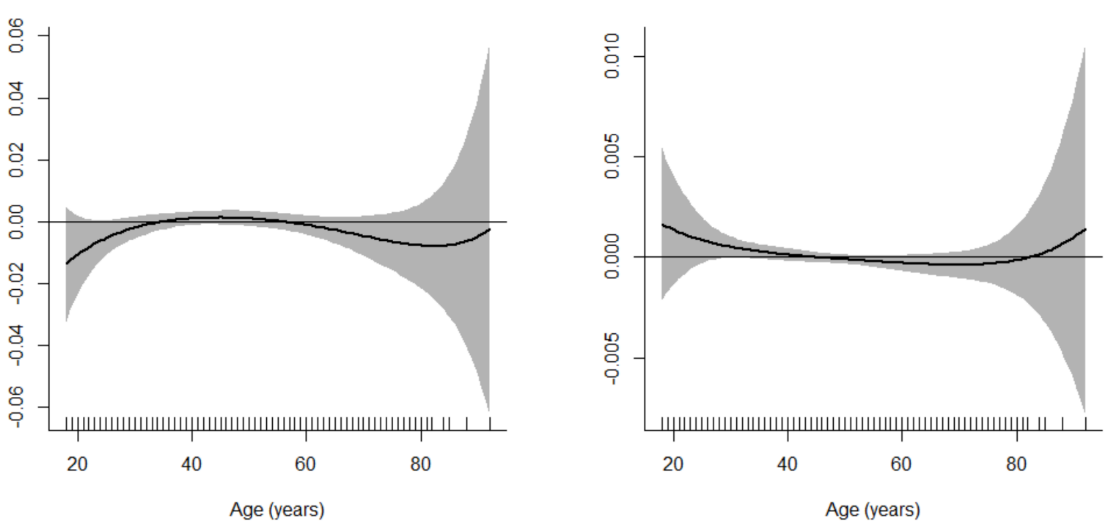
**
